# Supplementary material
Source: PubMed Central journal article supplement (PMC6501929)
Supplement: rspb20190497supp1.pdf [file rspb20190497supp1.pdf]

1 SUPPLEMENTARY MATERIAL

2

3 **Release from intralocus sexual conflict?**

4 **Evolved loss of a male sexual trait**

5 **demasculinises female gene expression**

6

7 Jack G. Rayner,<sup>1,\*</sup>† Sonia Pascoal,<sup>2,†</sup> Nathan W. Bailey<sup>1,\*</sup>

8

9 <sup>1</sup>School of Biology, University of St Andrews, St Andrews, Fife KY16 9TH, UK

10 <sup>2</sup>Department of Zoology, University of Cambridge, CB2 3EJ, UK

11

12 †These authors contributed equally to this work.

13 \***Corresponding authors:** E-mails: jr228@st-andrews.ac.uk, nwb3@st-andrews.ac.uk

## 14 **SI. SUPPORTING METHODS**

15

### 16 **Cricket rearing and production of lines**

17 Pure-breeding *normal-wing* (*NW*) and *flatwing* (*FW*) lines from which RNA samples  
18 were collected were derived from individuals caught in Kauai, Hawaii in 2012  
19 following the procedures detailed in Pascoal et al. (2016), and thereafter maintained  
20 under common garden conditions at 25 °C on a 12h:12h light:dark cycle in an  
21 incubator with calling males present. Lines used in the follow-up comparison of  
22 reproductive output of *NW* and *FW* genotypes of the two sexes were descended from  
23 the same lines from which RNA samples were collected, but had since been  
24 outcrossed by breeding *NW* and *FW* lines together to reduce effects of inbreeding.  
25 Pure-breeding *NW* and *FW* lines were subsequently re-established by mating  
26 heterozygous females with males of the desired morph, then backcrossing in the next  
27 generation and screening offspring to retain homozygous families. All crickets were  
28 reared under common-garden conditions, exposed to acoustic signals of other  
29 crickets in the environment. Note that *FW* and *NW* lines have not been found to differ  
30 in development time (Rayner & Bailey, unpublished data).

31

### 32 **Collection and sequencing of RNA samples**

33 Head and body tissues were separated and the digestive tract discarded, then  
34 samples were stored in RNAlater at -20 °C. Immediately prior to RNA extraction,  
35 neural tissue was dissected from the head capsule, and thoracic muscle and testes  
36 or ovaries were dissected from the body cavity. Quantity and integrity of RNA  
37 samples were assessed using Qubit broad range (Invitrogen) and Agilent

38 Bioanalyzer assays, respectively. Total RNA was depleted with RiboZero and used in  
39 the ScriptSeq protocol (Epicentre), following manufacturer instructions. Samples  
40 were sequenced on an Illumina HiSeq 2000 with version 3 chemistry, generating  
41 2x100 bp paired end reads. CASAVA v1.8.2 (Illumina) was used for basecalling and  
42 de-multiplexing of indexed reads. Adapter sequences were trimmed from fastq files  
43 using Cutadapt v1.2.1 (Martin 2011) and low quality bases were removed using  
44 Sickle v1.200 with a minimum window quality score of 20.

45

#### 46 **Trinity Assembly Quality**

47 Across all 36 samples, sequencing produced 844,050,339 paired reads which  
48 passed trimming (Table S4). Trinity-identified genes and isoforms showing greater  
49 than 95% similarity were clustered using CD-hit-est (Li & Godzik 2006). Assembly  
50 completeness was assessed by testing for the presence of insect BUSCO groups of  
51 conserved expressed genes (Simão et al. 2015). Reads were aligned to the  
52 transcriptome using Bowtie2 (Langmead & Salzberg 2012) with strand-specific  
53 settings, and quantified in RSEM (Li & Dewey 2011) at the Trinity gene level using  
54 default parameters. Trinity-identified 'genes' without open reading frames (ORFs) of  
55 >100 amino acids in length were removed so that only transcripts with evidence of  
56 protein coding regions were included in the analysis.

57 Trinity *de novo* transcriptome assembly statistics, before and after ORF  
58 expression-based filtering are given in Table S5. BUSCO analysis of the unfiltered  
59 transcriptome showed 97.8% of 1658 conserved insect genes were present in the  
60 unfiltered transcriptome, 7.2% fragmented, and 90.6% complete; of which, after  
61 extracting the longest putative isoform for each gene, only 1.8% were duplicated.

62 Together, these statistics suggest the filtered assembly is of a good quality, at least  
63 comparable with previously published *de novo* assemblies for *T. oceanicus* and  
64 closely related species (Bailey et al. 2013; Berdan et al. 2016; Kasumovic et al. 2016;  
65 Pascoal et al. 2016; Pascoal et al. 2018a). Only the 42,496 transcripts passing ORF  
66 and expression filters were included in downstream analyses.

67

## 68 **Differential Expression Analyses**

69 Prior to constructing models, transcripts not expressed at a level above one count  
70 per million in a minimum of three samples were filtered from the dataset, as these  
71 were considered to have little empirical support and because their removal increased  
72 power to identify DE transcripts. After filtering, input counts were adjusted using  
73 trimmed mean of M-values (TMM) normalisation.

74 Separate models were initially constructed for somatic (including neural tissue  
75 and thoracic muscle from both sexes), and gonad (testes and ovaries) samples.  
76 Scaled normalisation procedures assume that no more than 50% of transcripts in a  
77 dataset are differentially expressed between any two groups of samples, which was  
78 likely to be violated in a single model including both reproductive and somatic  
79 tissues. Importantly, however, the TMM method is relatively robust against violations  
80 of this assumption (Robinson & Oshlack 2010). For downstream investigation of sex-  
81 biased patterns of gene expression it was convenient to combine gonad tissues from  
82 both sexes in a single model, despite the expectation that a very large proportion of  
83 transcripts would be differentially expressed between the sexes. We tested the  
84 validity of results from this combined gonad model by also constructing and  
85 comparing separate models for testes and ovaries samples. For downstream

86 analyses involving gonad tissues we used results from the model including gonad  
87 tissues from both sexes, as comparison of the identity of statistically DE transcripts  
88 indicated a high degree of overlap between separate and combined-sex models for  
89 ovaries (140 DE in ovaries model, 185 DE in combined sex model; 123 out of 140  
90 (87.76%) DE transcripts shared between the two), while 16 transcripts were DE in  
91 testes samples in the separate sex model, versus 9 in the combined-sex model (6  
92 out of 9 shared between the two).

93 Negative binomial generalised linear models (GLMs) were constructed in  
94 edgeR (Robinson et al. 2010), and tested using likelihood ratio tests. Once models  
95 had been constructed, pairwise contrasts were performed between groups of  
96 samples, as recommended by the authors of EdgeR for more complex experimental  
97 designs (Robinson et al. 2010), with a Benjamini and Hochberg-adjusted significance  
98 threshold of  $FDR < 0.01$ . Contrasts were specified to examine the number of DE  
99 transcripts between morph genotypes for each of the tissues in each sex, as well as  
100 a sex comparison which was performed by contrasting average male and female  
101 expression values (i.e. samples for both morph genotypes were included for each  
102 sex). The approach of including both morph genotypes in sex comparisons was  
103 adopted to avoid statistical artefacts that could result from defining sex-biased  
104 transcripts using only normal-winged samples, i.e. using the same reference groups  
105 in both sex (*NW* male vs *NW* female) and morph (e.g. *NW* male vs *FW* male)  
106 comparisons (see: Mallard et al. 2018).

107

## 108 **Calculating Scaled Mass Index**

109 Scaled mass index (SMI) was calculated using the following equation:

110 
$$\widehat{M}_i = M_i \left[ \frac{L_0}{L_i} \right]^{b_{SMA}}$$

111 where for each individual,  $i$ ,  $M_i$  and  $L_i$  represent mass (with total egg mass or testes  
112 mass deducted) and pronotum length, respectively,  $L_0$  is the mean pronotum length  
113 within the population, and  $b_{SMA}$  is a scaling component, here estimated by log-log  
114 standardised major axis (SMA) regression of somatic mass on pronotum length.  
115 Averages and SMA regression were calculated separately for each of the sexes.  
116

117 **SII. SUPPORTING REFERENCES**

- 118 Bailey, N.W., Veltsos, P., Tan, Y.F., Millar, A.H., Ritchie, M.G. & Simmons, L.W.  
119 (2013) Tissue-specific transcriptomics in the field cricket *Teleogryllus oceanicus*.  
120 *G3 (Bethesda)*, 3(2): 225–30.
- 121 Berdan, E.L., Blankers, T., Waurick, I., Mazzoni, C.J., & Mayer, F. (2016) A genes  
122 eye view of ontogeny: de novo assembly and profiling of the *Gryllus rubens*  
123 transcriptome. *Molecular Ecology Resources*, 16(6): 1478–1490.
- 124 Kasumovic, M.M., Chen, Z. & Wilkins, M.R., (2016) Australian black field crickets  
125 show changes in neural gene expression associated with socially-induced  
126 morphological , life- history , and behavioral plasticity. *BMC Genomics*, 17(827):  
127 1–35.
- 128 Lun, A.T.L., Chen, Y., & Smyth, G.K., (2016) It's DE-licious: A recipe for differential  
129 expression analyses of RNA-seq experiments using quasi-likelihood methods in  
130 edgeR. *Methods in Molecular Biology*. DOI: 10.1007/978-1-4939-3578-9\_19
- 131 Mallard, F., Jakšić, A.M. & Schlötterer, C. (2018) Contesting the evidence for non-  
132 adaptive plasticity. *Nature*, 555: E21.
- 133 Martin, M. (2011) Cutadapt removes adapter sequences from high-throughput  
134 sequencing reads. *EMBnet.journal*, 17(1): 10.
- 135 Pascoal, S., Liu, X., Fang, Y., Paterson, S., Ritchie, M.G., Rockliffe, N. et al. (2018a).  
136 Increased socially mediated plasticity in gene expression accompanies rapid  
137 adaptive evolution. *Ecol. Lett.*, 21(4):546-556.
- 138 Pascoal, S., Risse, J.E., Zhang, X., Blaxter, M., Cezard, T. et al. (2018b) Silent  
139 crickets reveal the genomic footprint of recent adaptive trait loss. bioRxiv  
140 <https://doi.org/10.1101/489526>.

141 Pascoal, S., Liu, X., Ly, T., Fang, Y., Rockliffe, N., Paterson, S. et al. (2016). Rapid  
142 evolution and gene expression: a rapidly evolving Mendelian trait that silences  
143 field crickets has widespread effects on mRNA and protein expression. *J. Evol.*  
144 *Biol.*, 29(6): 1234–1246.

145 Robinson, M.D. & Oshlack, A. (2010) A scaling normalization method for differential  
146 expression analysis of RNA-seq data. *Genome Biology*, 11(3).

147 Simão, F.A., Waterhouse, R.M., Ioannidis, P., Kriventseva, E.V., Zdobnov, E.M.  
148 (2015). BUSCO: Assessing genome assembly and annotation completeness  
149 with single-copy orthologs. *Bioinformatics*, 31(19): 3210–3212.

150



151  
152  
153

### III. SUPPORTING FIGURES

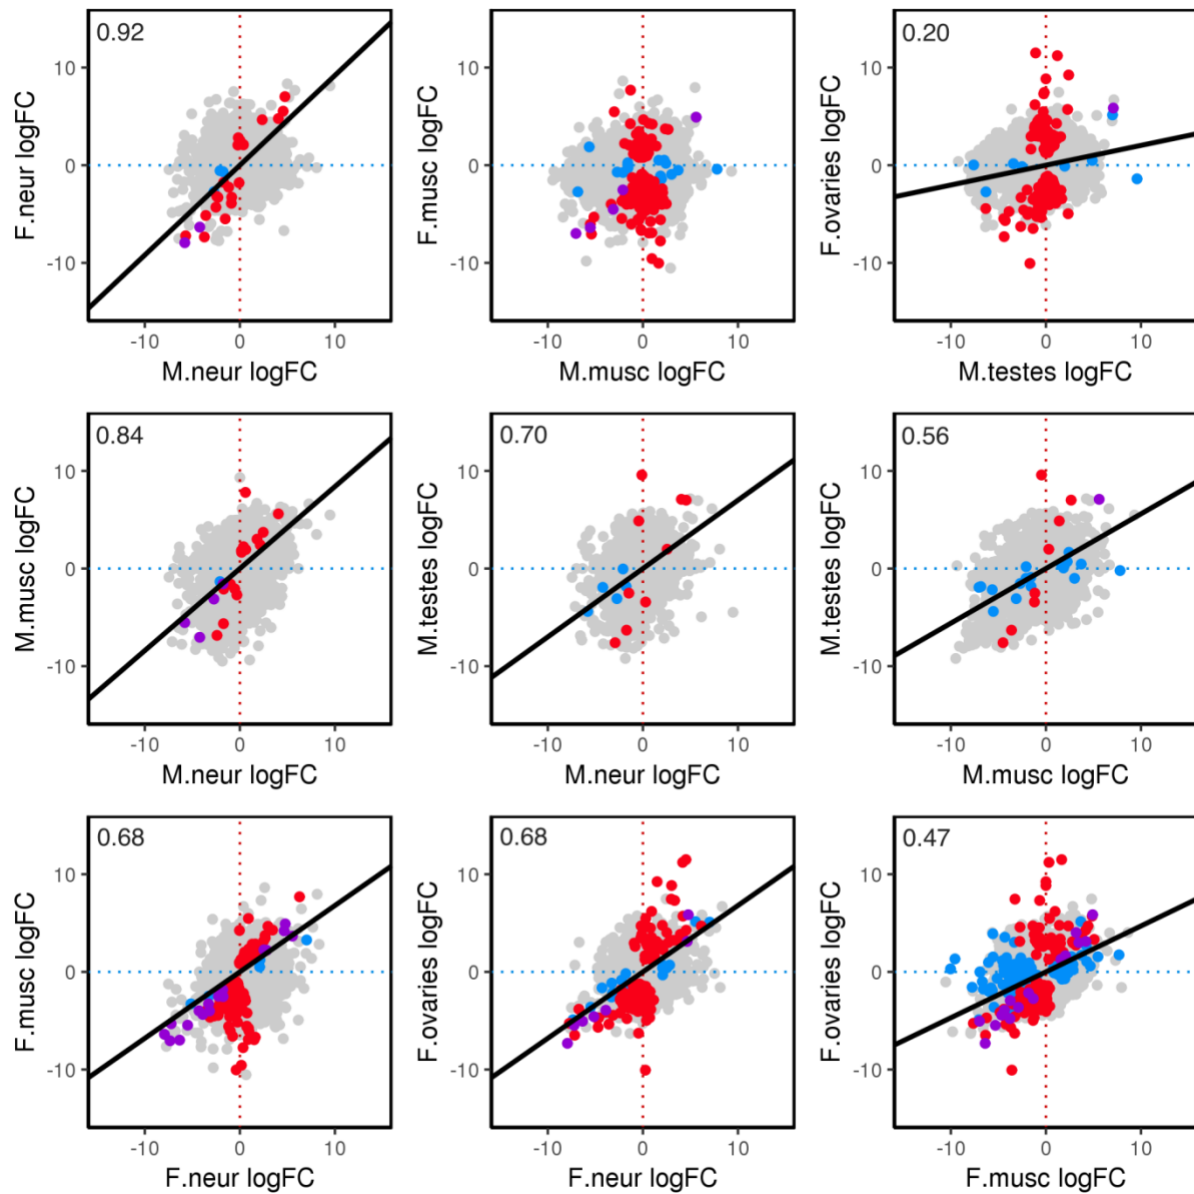

154

155 **Fig. S1.** Concordance of *flatwing*-associated gene expression changes in  
156 different sexes (top) and across male (middle row) and female (bottom row)  
157 tissues. Greater values along either axis indicate a transcript was more *FW*-  
158 biased. Transcripts DE in the x-axis comparison are highlighted in blue,  
159 transcripts DE in the y-axis comparison in red, and transcripts DE in both  
160 comparisons in purple. Lines and annotations denote coefficients from  
161 Spearman's rank correlation ( $P < 0.01$ ) across transcripts DE in either  
162 comparison.

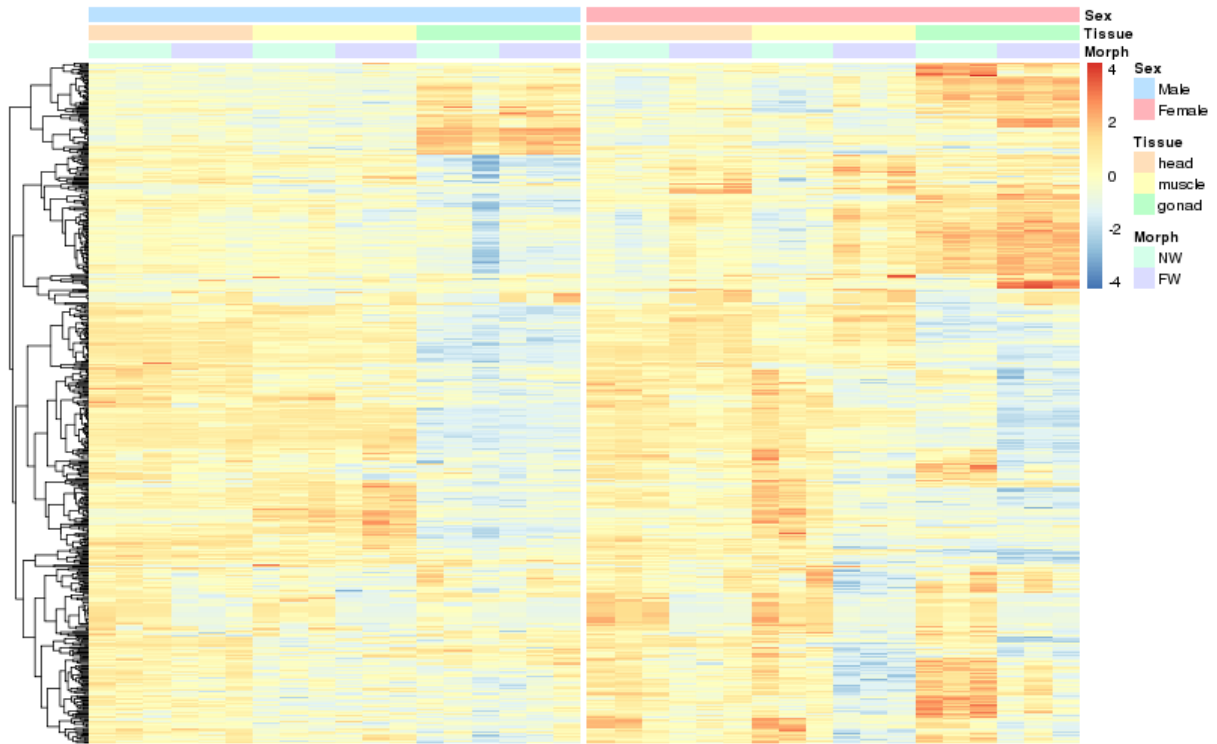

163

164 **Figure S2.** Heatmap showing expression values ( $\log_2$ -transformed counts per  
 165 million) across all samples for transcripts significantly ( $FDR < 0.01$ ) DE in any morph  
 166 genotype comparison, z-scaled by row, for each of the morph genotypes and tissues.  
 167 Note that expression values for somatic (neural and thoracic muscle) and gonad  
 168 tissues are derived from separately normalised libraries, thus only relative (NW vs  
 169 FW), not absolute, expression values can be compared between the two.  
 170

171

172

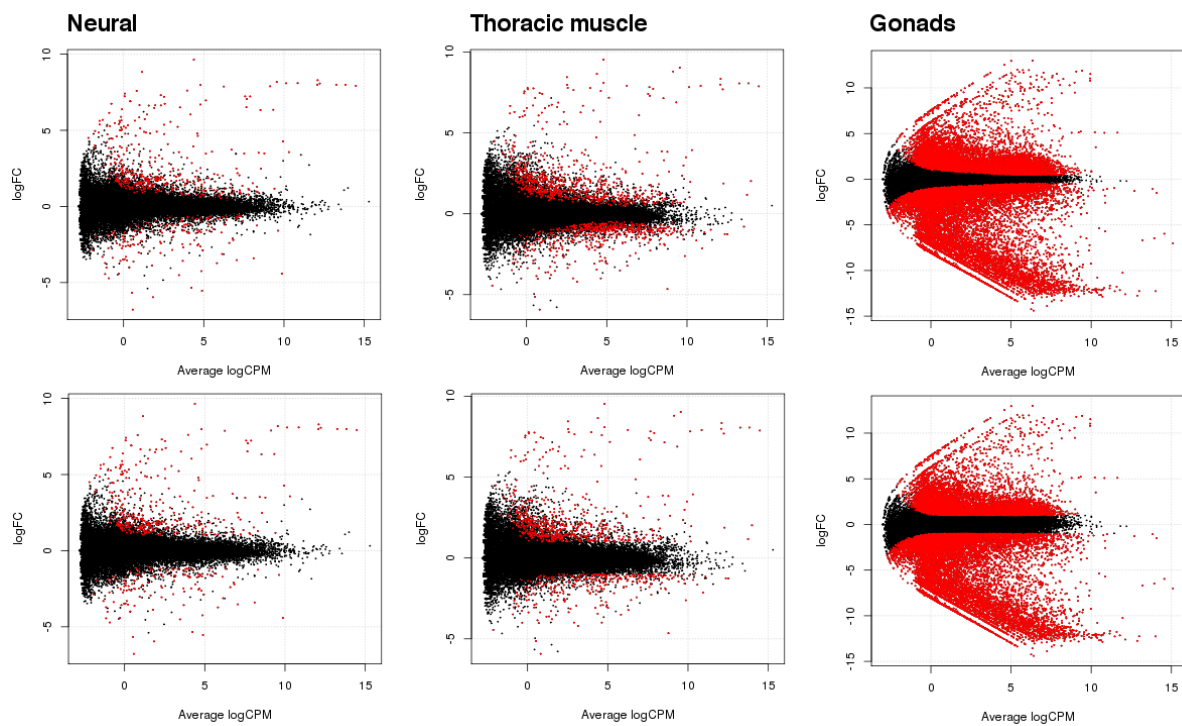

173  
 174  
 175  
 176  
 177  
 178  
 179

**Figure S3.** Volcano plots for sex comparisons between each of the tissues, showing expression level in log<sub>2</sub> counts-per-million along the X-axis, and log<sub>2</sub>-fold change on the Y-axis. Red points are transcripts identified as DE at FDR<0.01. In the top row, no fold-change threshold is imposed for a transcript to be DE, whereas in the bottom row a log<sub>2</sub>-fold change of 1 (fold-change of 2) threshold is imposed.

180 **SIV. SUPPORTING TABLES**

181

182

183

**Table S1.** Significantly enriched GO categories for each of the female genotypes. Male genotypes showed no significant GO enrichment.

| Genotype  | GO Name                                                       | GO Category        | FDR         | Nr<br>Test | Nr<br>Reference | Non Annot<br>Test | Non Annot<br>Reference |
|-----------|---------------------------------------------------------------|--------------------|-------------|------------|-----------------|-------------------|------------------------|
| Female.FW | endomembrane system                                           | CELLULAR_COMPONENT | 1.82E-09    | 30         | 648             | 104               | 14195                  |
| Female.FW | endoplasmic reticulum                                         | CELLULAR_COMPONENT | 1.96E-07    | 15         | 160             | 119               | 14683                  |
| Female.FW | ncRNA metabolic process                                       | BIOLOGICAL_PROCESS | 0.005780891 | 9          | 118             | 125               | 14725                  |
| Female.FW | tRNA aminoacylation for protein translation                   | BIOLOGICAL_PROCESS | 0.0179214   | 5          | 33              | 129               | 14810                  |
| Female.FW | cytoplasm                                                     | CELLULAR_COMPONENT | 0.0179214   | 40         | 2291            | 94                | 12552                  |
| Female.FW | ligase activity, forming aminoacyl-tRNA and related compounds | MOLECULAR_FUNCTION | 0.0179214   | 5          | 32              | 129               | 14811                  |
| Female.FW | ligase activity, forming carbon-oxygen bonds                  | MOLECULAR_FUNCTION | 0.0179214   | 5          | 32              | 129               | 14811                  |
| Female.FW | aminoacyl-tRNA ligase activity                                | MOLECULAR_FUNCTION | 0.0179214   | 5          | 32              | 129               | 14811                  |
| Female.FW | tRNA aminoacylation                                           | BIOLOGICAL_PROCESS | 0.0179214   | 5          | 33              | 129               | 14810                  |
| Female.FW | amino acid activation                                         | BIOLOGICAL_PROCESS | 0.0179214   | 5          | 33              | 129               | 14810                  |
| Female.FW | tRNA metabolic process                                        | BIOLOGICAL_PROCESS | 0.029074957 | 6          | 64              | 128               | 14779                  |
| Female.FW | phenylalanyl-tRNA aminoacylation                              | BIOLOGICAL_PROCESS | 0.041903784 | 2          | 0               | 132               | 14843                  |
| Female.FW | cell                                                          | CELLULAR_COMPONENT | 0.041903784 | 63         | 4622            | 71                | 10221                  |
| Female.FW | phenylalanine-tRNA ligase activity                            | MOLECULAR_FUNCTION | 0.041903784 | 2          | 0               | 132               | 14843                  |
| Female.FW | endodermal digestive tract morphogenesis                      | BIOLOGICAL_PROCESS | 0.041903784 | 2          | 0               | 132               | 14843                  |
| Female.FW | cell part                                                     | CELLULAR_COMPONENT | 0.041903784 | 63         | 4622            | 71                | 10221                  |
| Female.FW | intracellular part                                            | CELLULAR_COMPONENT | 0.041903784 | 55         | 3827            | 79                | 11016                  |
| Female.FW | UDP-glucose:glycoprotein glucosyltransferase activity         | MOLECULAR_FUNCTION | 0.041903784 | 2          | 0               | 132               | 14843                  |
| Female.FW | cellular process                                              | BIOLOGICAL_PROCESS | 0.041903784 | 71         | 5412            | 63                | 9431                   |
| Female.FW | intracellular                                                 | CELLULAR_COMPONENT | 0.049092922 | 55         | 3861            | 79                | 10982                  |
| Female.NW | muscle cell development                                       | BIOLOGICAL_PROCESS | 1.80E-12    | 15         | 87              | 91                | 14784                  |
| Female.NW | striated muscle cell development                              | BIOLOGICAL_PROCESS | 1.80E-12    | 15         | 86              | 91                | 14785                  |
| Female.NW | myofibril assembly                                            | BIOLOGICAL_PROCESS | 8.63E-11    | 13         | 75              | 93                | 14796                  |
| Female.NW | striated muscle cell differentiation                          | BIOLOGICAL_PROCESS | 8.63E-11    | 15         | 121             | 91                | 14750                  |
| Female.NW | muscle cell differentiation                                   | BIOLOGICAL_PROCESS | 1.25E-10    | 15         | 128             | 91                | 14743                  |
| Female.NW | sarcomere                                                     | CELLULAR_COMPONENT | 1.67E-09    | 12         | 77              | 94                | 14794                  |

|           |                                                          |                    |             |    |      |     |       |
|-----------|----------------------------------------------------------|--------------------|-------------|----|------|-----|-------|
| Female.NW | supramolecular complex                                   | CELLULAR_COMPONENT | 1.67E-09    | 16 | 196  | 90  | 14675 |
| Female.NW | supramolecular polymer                                   | CELLULAR_COMPONENT | 1.67E-09    | 16 | 194  | 90  | 14677 |
| Female.NW | actomyosin structure organization                        | BIOLOGICAL_PROCESS | 1.67E-09    | 13 | 103  | 93  | 14768 |
| Female.NW | myofibril                                                | CELLULAR_COMPONENT | 1.99E-09    | 12 | 83   | 94  | 14788 |
| Female.NW | contractile fiber part                                   | CELLULAR_COMPONENT | 1.99E-09    | 12 | 82   | 94  | 14789 |
| Female.NW | contractile fiber                                        | CELLULAR_COMPONENT | 1.99E-09    | 12 | 83   | 94  | 14788 |
| Female.NW | A band                                                   | CELLULAR_COMPONENT | 1.23E-08    | 7  | 11   | 99  | 14860 |
| Female.NW | cellular component assembly involved in morphogenesis    | BIOLOGICAL_PROCESS | 1.23E-08    | 13 | 129  | 93  | 14742 |
| Female.NW | supramolecular fiber                                     | CELLULAR_COMPONENT | 1.23E-08    | 15 | 194  | 91  | 14677 |
| Female.NW | muscle structure development                             | BIOLOGICAL_PROCESS | 9.56E-08    | 16 | 272  | 90  | 14599 |
| Female.NW | sarcomere organization                                   | BIOLOGICAL_PROCESS | 3.15E-07    | 9  | 55   | 97  | 14816 |
| Female.NW | skeletal myofibril assembly                              | BIOLOGICAL_PROCESS | 4.20E-07    | 5  | 3    | 101 | 14868 |
| Female.NW | organelle assembly                                       | BIOLOGICAL_PROCESS | 1.34E-06    | 13 | 198  | 93  | 14673 |
| Female.NW | muscle thin filament assembly                            | BIOLOGICAL_PROCESS | 1.60E-06    | 5  | 5    | 101 | 14866 |
| Female.NW | adult somatic muscle development                         | BIOLOGICAL_PROCESS | 1.60E-06    | 6  | 14   | 100 | 14857 |
| Female.NW | skeletal muscle myosin thick filament assembly           | BIOLOGICAL_PROCESS | 4.36E-06    | 4  | 1    | 102 | 14870 |
| Female.NW | striated muscle myosin thick filament assembly           | BIOLOGICAL_PROCESS | 4.36E-06    | 4  | 1    | 102 | 14870 |
| Female.NW | supramolecular fiber organization                        | BIOLOGICAL_PROCESS | 6.40E-06    | 13 | 232  | 93  | 14639 |
| Female.NW | muscle contraction                                       | BIOLOGICAL_PROCESS | 2.89E-05    | 6  | 26   | 100 | 14845 |
| Female.NW | actin cytoskeleton organization                          | BIOLOGICAL_PROCESS | 4.46E-05    | 13 | 278  | 93  | 14593 |
| Female.NW | myosin filament assembly                                 | BIOLOGICAL_PROCESS | 5.12E-05    | 4  | 4    | 102 | 14867 |
| Female.NW | actin filament-based process                             | BIOLOGICAL_PROCESS | 7.67E-05    | 13 | 294  | 93  | 14577 |
| Female.NW | muscle system process                                    | BIOLOGICAL_PROCESS | 8.63E-05    | 6  | 33   | 100 | 14838 |
| Female.NW | structural constituent of muscle                         | MOLECULAR_FUNCTION | 1.10E-04    | 5  | 17   | 101 | 14854 |
| Female.NW | non-membrane-bounded organelle                           | CELLULAR_COMPONENT | 5.72E-04    | 25 | 1251 | 81  | 13620 |
| Female.NW | intracellular non-membrane-bounded organelle             | CELLULAR_COMPONENT | 5.72E-04    | 25 | 1251 | 81  | 13620 |
| Female.NW | myosin filament organization                             | BIOLOGICAL_PROCESS | 0.001041773 | 4  | 12   | 102 | 14859 |
| Female.NW | anatomical structure formation involved in morphogenesis | BIOLOGICAL_PROCESS | 0.001205333 | 14 | 450  | 92  | 14421 |
| Female.NW | myosin complex                                           | CELLULAR_COMPONENT | 0.002402313 | 5  | 36   | 101 | 14835 |
| Female.NW | tissue development                                       | BIOLOGICAL_PROCESS | 0.003135179 | 21 | 1035 | 85  | 13836 |
| Female.NW | somatic muscle development                               | BIOLOGICAL_PROCESS | 0.003667131 | 6  | 70   | 100 | 14801 |

|           |                                        |                    |             |    |      |     |       |
|-----------|----------------------------------------|--------------------|-------------|----|------|-----|-------|
| Female.NW | cytoskeleton organization              | BIOLOGICAL_PROCESS | 0.004851486 | 15 | 588  | 91  | 14283 |
| Female.NW | actin cytoskeleton                     | CELLULAR_COMPONENT | 0.005463022 | 7  | 115  | 99  | 14756 |
| Female.NW | single-organism organelle organization | BIOLOGICAL_PROCESS | 0.007631604 | 14 | 541  | 92  | 14330 |
| Female.NW | actin-dependent ATPase activity        | MOLECULAR_FUNCTION | 0.00827667  | 3  | 7    | 103 | 14864 |
| Female.NW | collagen trimer                        | CELLULAR_COMPONENT | 0.010052005 | 2  | 0    | 104 | 14871 |
| Female.NW | Z disc                                 | CELLULAR_COMPONENT | 0.012809765 | 5  | 55   | 101 | 14816 |
| Female.NW | I band                                 | CELLULAR_COMPONENT | 0.013560177 | 5  | 56   | 101 | 14815 |
| Female.NW | flight behavior                        | BIOLOGICAL_PROCESS | 0.019818808 | 4  | 31   | 102 | 14840 |
| Female.NW | flight                                 | BIOLOGICAL_PROCESS | 0.021919929 | 3  | 11   | 103 | 14860 |
| Female.NW | developmental process                  | BIOLOGICAL_PROCESS | 0.026149506 | 38 | 3005 | 68  | 11866 |
| Female.NW | structural molecule activity           | MOLECULAR_FUNCTION | 0.028546329 | 9  | 270  | 97  | 14601 |
| Female.NW | cytoskeletal part                      | CELLULAR_COMPONENT | 0.043255702 | 13 | 573  | 93  | 14298 |
| Female.NW | single-organism developmental process  | BIOLOGICAL_PROCESS | 0.044807148 | 37 | 2977 | 69  | 11894 |
| Female.NW | anatomical structure development       | BIOLOGICAL_PROCESS | 0.044807148 | 36 | 2864 | 70  | 12007 |

184

185 **Table S2.** Results from mixed models for proximate measures of reproductive  
 186 output, body condition and body size.

|                                  | <i>N</i> | $\chi^2_1$ | <i>df</i> | <b>P-value</b>   |
|----------------------------------|----------|------------|-----------|------------------|
| In testes mass (mg) <sup>1</sup> | 139      |            |           |                  |
| Morph                            |          | 8.800      | 1         | <b>0.003</b>     |
| In pronotum length               |          | 0.875      | 1         | 0.350            |
| In somatic mass                  |          | 33.841     | 1         | <b>&lt;0.001</b> |
| Egg mass (mg) <sup>2</sup>       | 145      |            |           |                  |
| Morph                            |          | 0.011      | 1         | 0.916            |
| In pronotum length               |          | 1.190      | 1         | 0.275            |
| In somatic mass                  |          | 2.688      | 1         | 0.101            |
| In somatic SMI (mg) <sup>1</sup> | 284      |            |           |                  |
| Sex                              |          | 14.071     | 1         | <b>&lt;0.001</b> |
| Morph                            |          | 5.095      | 1         | <b>0.024</b>     |
| Sex × Morph                      |          | 14.006     | 1         | <b>&lt;0.001</b> |

187 All mixed models included a random effect of biological line, and pronotum length  
 188 and somatic mass measures were standardized. In indicates natural log.

189 <sup>1</sup> LMM

190 <sup>2</sup> Negative binomial GLMM

191

192

193 **Table S3.** Results from LMMs for measures of pronotum length and somatic mass.

|                      | <i>N</i> | $\chi^2_1$ | <i>df</i> | <b>P-value</b> |
|----------------------|----------|------------|-----------|----------------|
| Pronotum length (mm) | 284      |            |           |                |
| Sex                  |          | 6.925      | 1         | <b>0.008</b>   |
| Morph                |          | 1.109      | 1         | 0.292          |
| Sex x Morph          |          | 0.007      | 1         | 0.934          |
| Somatic mass (mg)    | 284      |            |           |                |
| Sex                  |          | 5.521      | 1         | <b>0.019</b>   |
| Morph                |          | 0.000      | 1         | 0.998          |
| Sex x Morph          |          | 6.493      | 1         | <b>0.011</b>   |

194 All mixed models included a random effect of biological line.



195 **Table S4.** Summary of the number of sequenced reads before and after trimming.

| Sample         | Untrimmed  | Trimmed    | R1/R2      |
|----------------|------------|------------|------------|
| 12-M-head-NW   | 61,006,572 | 60,574,658 | 30,135,313 |
| 13-M-musc-NW   | 52,305,462 | 51,887,011 | 25,750,536 |
| 14-M-testes-NW | 32,528,962 | 32,272,950 | 16,016,686 |
| 15-M-head-NW   | 45,129,482 | 44,800,976 | 22,253,685 |
| 16-M-musc-NW   | 38,802,556 | 38,548,881 | 19,152,513 |
| 17-M-testes-NW | 45,673,402 | 45,345,163 | 22,526,496 |
| 18-M-head-NW   | 45,144,822 | 44,759,087 | 22,255,296 |
| 19-M-musc-NW   | 41,938,996 | 41,687,713 | 20,723,620 |
| 20-M-testes-NW | 46,192,918 | 45,807,083 | 22,753,029 |
| 21-M-head-FW   | 41,271,576 | 41,009,761 | 20,390,600 |
| 22-M-musc-FW   | 38,299,684 | 37,927,595 | 18,827,916 |
| 23-M-testes-FW | 34,296,850 | 34,040,366 | 16,913,615 |
| 24-M-head-FW   | 38,464,592 | 38,194,020 | 18,981,007 |
| 25-M-musc-FW   | 40,841,770 | 40,536,785 | 20,167,484 |
| 26-M-testes-FW | 56,988,020 | 56,698,696 | 28,215,093 |
| 27-M-head-FW   | 35,047,354 | 34,844,351 | 17,324,645 |
| 28-M-musc-FW   | 31,835,044 | 31,523,465 | 15,689,092 |
| 29-M-testes-FW | 35,387,996 | 35,209,052 | 17,526,777 |
| 30-F-head-NW   | 42,161,524 | 41,907,832 | 20,851,634 |
| 31-F-musc-NW   | 35,282,270 | 45,057,779 | 17,431,719 |
| 32-F-ovary-NW  | 41,918,270 | 41,671,898 | 20,720,037 |
| 33-F-head-NW   | 54,750,504 | 54,366,572 | 27,009,996 |
| 34-F-musc-NW   | 36,707,644 | 36,478,463 | 18,133,920 |
| 35-F-ovary-NW  | 61,241,274 | 60,568,124 | 30,140,953 |
| 36-F-head-NW   | 40,529,344 | 40,286,894 | 20,029,845 |
| 37-F-musc-NW   | 60,875,116 | 60,420,336 | 30,002,776 |
| 38-F-ovary-NW  | 49,069,420 | 48,778,590 | 24,262,153 |
| 39-F-head-FW   | 68,246,640 | 67,735,805 | 33,665,646 |
| 40-F-musc-FW   | 53,574,414 | 53,152,845 | 26,401,475 |
| 41-F-ovary-FW  | 60,275,904 | 59,672,380 | 29,544,754 |
| 42-F-head-FW   | 49,036,456 | 48,319,730 | 23,843,272 |
| 43-F-musc-FW   | 46,013,420 | 45,292,669 | 22,295,013 |
| 44-F-ovary-FW  | 72,280,210 | 71,502,322 | 35,382,796 |
| 45-F-head-FW   | 72,769,140 | 71,884,165 | 35,552,881 |
| 46-F-musc-FW   | 50,181,870 | 49,502,672 | 24,456,228 |
| 47-F-ovary-FW  | 58,764,358 | 58,047,104 | 28,721,838 |

197 **Table S5.** Summary statistics for full and filtered Trinity *de novo* transcriptome assemblies (longest isoform only)

|                      | Full assembly | Filtered clustered<br>assembly |
|----------------------|---------------|--------------------------------|
| Total Trinity genes  | 2,573,977     | 42,496                         |
| N10                  | 2,129         | 6,764                          |
| N20                  | 1,151         | 5,106                          |
| N30                  | 729           | 4,147                          |
| N40                  | 522           | 3,446                          |
| N50                  | 411           | 2,900                          |
| Median contig length | 290           | 1,859                          |
| Mean contig length   | 413.35        | 2,293                          |
| Total bases          | 1,063,945,697 | 302,614,475                    |

198
